# Supplementary material for: Complementarity of empirical and process-based approaches to modelling mosquito population dynamics with Aedes albopictus as an example—Application to the development of an operational mapping tool of vector populations
Source: PLOS journal article supplement (doi:10.1371/journal.pone.0227407), 2020-01-17
Supplement: S6 (10.1371/journal.pone.0227407.s006) [file journal.pone.0227407.s006]

# Supplementary Information for

## Complementarity of empirical and process-based approaches to modelling mosquito population dynamics with *Aedes albopictus* as an example – application to the development of an operational mapping tool of vector populations

Annelise Tran, Morgan Mangeas, Marie Demarchi, Emmanuel Roux, Pascal Degenne, Marion Haramboure, Gilbert Le Goff, David Damiens, Louis-Clément Gouagna, Vincent Herbreteau, Jean-Sébastien Dehecq

### S1 File: *Aedes albopictus* egg collections used to assess the process-based population dynamics model

For the comparison with the process-based model outputs, the Duparc site (2 operational zones of 14 and 16 ha) located close to the Sainte-Marie ‘La Mare’ weather station was selected. Egg collections were performed weekly between May 2013 and August 2014, using ovitraps in different sites in Sainte-Marie (Latitude: 20° 52' 60"S. Longitude: 55° 33' 58" E) (Figure S1a, Table S1).

A total of 24 ovitraps, which are artificial egg-laying containers, were randomly deployed in the Duparc study site, and were set up in private human dwellings or public areas, usually at ground level in shaded locations. Each ovitrap consists of a 1 liter black plastic container (13 cm in diameter x 12 cm in height) that is partially filled with 650 ml of river water or tap water. The oviposition substrate was made of a brown germination paper clipped on a 15 x 10 cm stiff PVC sheet.

Taking into account the weekly frequency of the ovitrap survey, the presence of larvae, especially pupae and / or pupal exuvia, was regularly monitored to prevent emergence. Oviposition activity and the number of eggs laid were monitored weekly. Upon removal, the substrates were left to dry under room temperature for at least 24 hours before the number of eggs from each of substrate was recorded under a dissecting microscope. Subsequently, egg papers were air dried for 5 days in a laboratory and dipped into a solution containing diluted dehydrated rabbit food suspension to induce hatching. The hatching rate was determined by counting the number of hatched and unhatched eggs under a stereomicroscope.

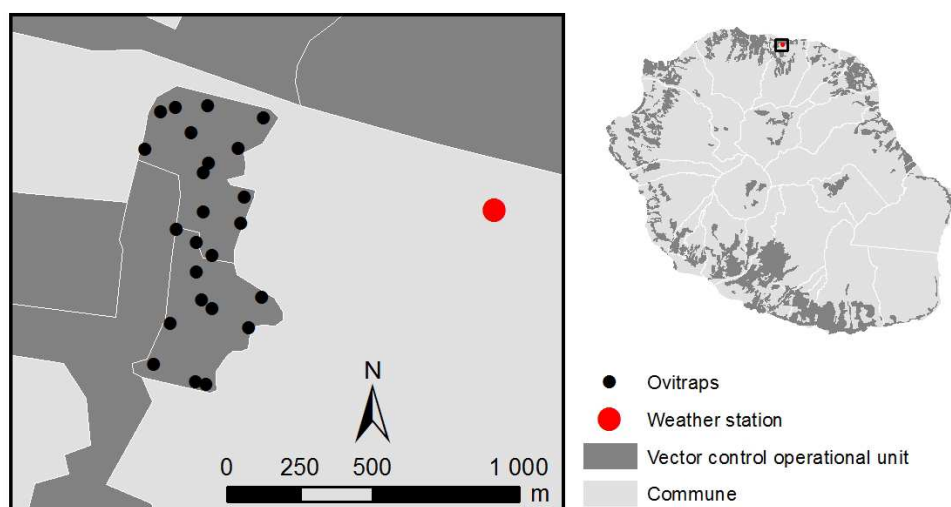

Figure S1a: Location of the ovitraps in the Duparc study site.

35 **Table S1. Results of egg collections, Duparc site, 2013-2015**

36

38

40

| Collection date<br>(DD/MM/YYYY) | Eggs /<br>trap |
|---------------------------------|----------------|
| 21/05/2013                      | 124.7          |
| 28/05/2013                      | 119.1          |
| 04/06/2013                      | 110.2          |
| 11/06/2013                      | 79.6           |
| 18/06/2013                      | 63.3           |
| 25/06/2013                      | 47.4           |
| 02/07/2013                      | 41.5           |
| 09/07/2013                      | 58.6           |
| 16/07/2013                      | 37.9           |
| 23/07/2013                      | 30.0           |
| 31/07/2013                      | 24.9           |
| 01/08/2013                      | 125.0          |
| 06/08/2013                      | 17.7           |
| 13/08/2013                      | 27.6           |
| 14/08/2013                      | 14.0           |
| 20/08/2013                      | 30.0           |
| 27/08/2013                      | 27.4           |
| 03/09/2013                      | 28.0           |
| 10/09/2013                      | 30.7           |
| 17/09/2013                      | 51.9           |
| 24/09/2013                      | 49.0           |
| 01/10/2013                      | 48.8           |
| 08/10/2013                      | 28.9           |
| 15/10/2013                      | 37.5           |
| 22/10/2013                      | 29.0           |
| 29/10/2013                      | 31.5           |
| 05/11/2013                      | 35.8           |
| 12/11/2013                      | 36.4           |
| 19/11/2013                      | 63.3           |
| 26/11/2013                      | 55.7           |
| 03/12/2013                      | 56.9           |
| 09/12/2013                      | 121.0          |
| 17/12/2013                      | 157.1          |

| Collection date<br>(DD/MM/YYYY) | Eggs /<br>trap |
|---------------------------------|----------------|
| 14/01/2014                      | 80.6           |
| 21/01/2014                      | 134.8          |
| 28/01/2014                      | 103.0          |
| 04/02/2014                      | 98.3           |
| 11/02/2014                      | 118.1          |
| 18/02/2014                      | 79.9           |
| 25/02/2014                      | 68.0           |
| 04/03/2014                      | 65.7           |
| 11/03/2014                      | 56.6           |
| 18/03/2014                      | 42.2           |
| 25/03/2014                      | 41.7           |
| 01/04/2014                      | 30.4           |
| 08/04/2014                      | 37.6           |
| 15/04/2014                      | 65.6           |
| 22/04/2014                      | 54.3           |
| 29/04/2014                      | 62.9           |
| 06/05/2014                      | 48.3           |
| 13/05/2014                      | 51.4           |
| 20/05/2014                      | 44.1           |
| 27/05/2014                      | 47.8           |
| 03/06/2014                      | 71.7           |
| 10/06/2014                      | 37.7           |
| 17/06/2014                      | 49.1           |
| 24/06/2014                      | 53.2           |
| 01/07/2014                      | 25.3           |
| 08/07/2014                      | 38.7           |
| 15/07/2014                      | 27.9           |
| 22/07/2014                      | 36.0           |
| 29/07/2014                      | 38.4           |
| 05/08/2014                      | 24.5           |
| 12/08/2014                      | 35.1           |
| 19/08/2014                      | 39.5           |
| 26/08/2014                      | 18.6           |

| Collection date<br>(DD/MM/YYYY) | Eggs /<br>trap |
|---------------------------------|----------------|
| 23/06/2015                      | 115.9          |
| 30/06/2015                      | 144.3          |
| 07/07/2015                      | 225.2          |
| 13/07/2015                      | 117.7          |
| 21/07/2015                      | 133.9          |
| 28/07/2015                      | 95.4           |
| 04/08/2015                      | 109.9          |
| 11/08/2015                      | 152.7          |
| 18/08/2015                      | 76.2           |
| 24/08/2015                      | 140.9          |
| 01/09/2015                      | 125.3          |
| 08/09/2015                      | 64.2           |
| 15/09/2015                      | 59.6           |
| 22/09/2015                      | 65.6           |
| 29/09/2015                      | 56.3           |
| 06/10/2015                      | 93.2           |
| 13/10/2015                      | 96.8           |
| 20/10/2015                      | 63.0           |
| 27/10/2015                      | 66.9           |
| 03/11/2015                      | 80.3           |
| 10/11/2015                      | 116.0          |

4137

39
